# Supplementary material
Source: PubMed Central journal article supplement (PMC4101002)
Supplement: NIHMS545372-supplement-1.pdf [file NIHMS545372-supplement-1.pdf]

Supplemental Figure 1

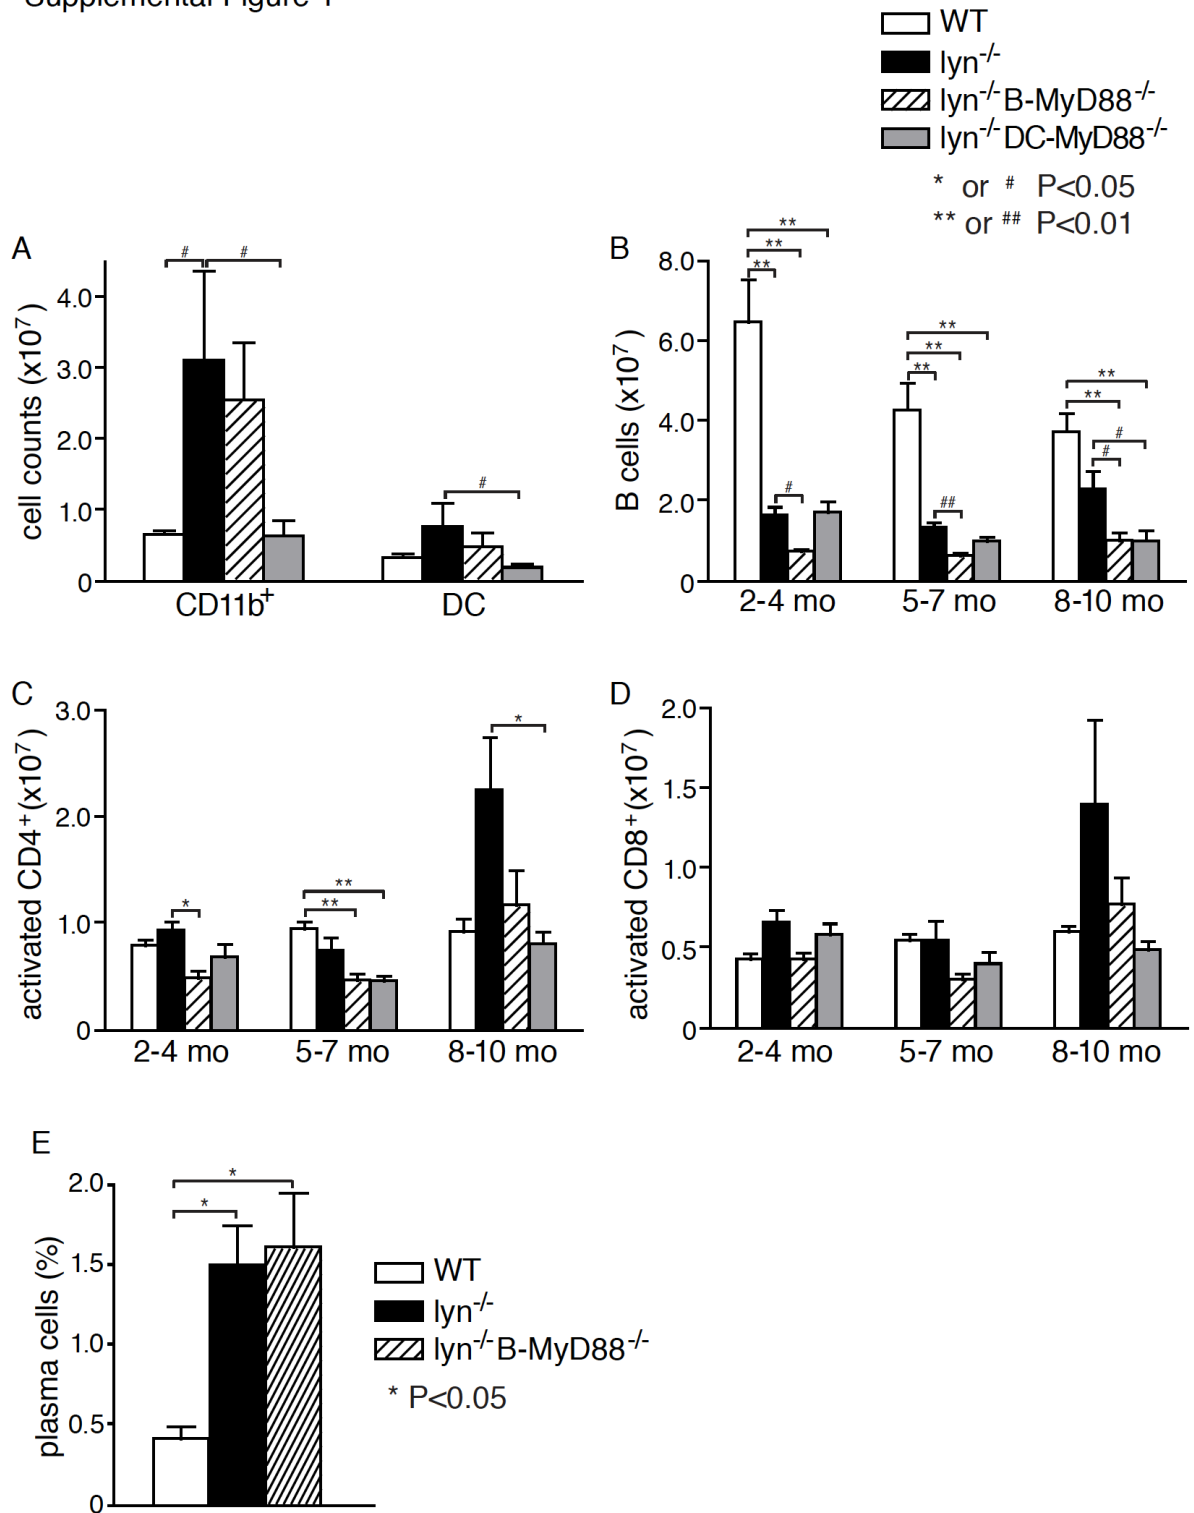

**Supplemental Figure 1.** A, numbers of CD11b<sup>+</sup> myeloid cells and of dendritic cells from the spleens of 8-10 month old mice of the indicated genotypes (mice analyzed in Figure 3). B, numbers of splenic B cells from the indicated mice analyzed in Figure 3. C and D, numbers of activated phenotype CD4<sup>+</sup> T cells (C) and of activated phenotype CD8<sup>+</sup> T cells (D) per spleen for the mice shown in Figure 4B and 4C. E, numbers of plasma cells from the indicated mice (age: 2-4 months); see legend to Figure 6 for details.
